# Supplementary material
Source: publisher figshare collection journal article supplement (https://tandf.figshare.com/ndownloader/files/22514723)
Supplement: Supplementary file 1 [file 22514723]

**Supplementary Data**

**Table 1.** EMSA oligos(Sequence of only top strand is shown.)

**A.** Rat DMP1 oligos(The nucleotide positions are those in the rat DMP1 promoter.)

| **oligo sequence nucleotide positions** |
| --- |
| rGS1 CTGGAAAGTCATTTGTGTCAG -5025 to -5005 |
| rGS2 AGTGGTGGTCATTTTAGACCA -4004 to -3984 |
| rGS3 AGATGTAGTCATTTGTATATG -3645 to -3625 |
| rGS4 TAACCAGGTCATTTTAGCATC -1944 to -1924 |
| rGS5 AATTTTAGTCATTTTCTTTCT -1823 to -1803 |
| rGS6 TAGTCTAGTCATTTGAGAACC -14 to +6 |

**B.** Mutant oligos (mutated nucleotides are shown in bold.)

| **oligo sequence nucleotide positions** |
| --- |
| rGS1mut CTGGAAA**TCGCACA**GTGTCAG -5025 to -5005 |
| rGS4mut TAACCAG**TCGCACA**TAGCATC -1944 to -1924 |

**C.** Mouse DMP1 oligos (The nucleotide positions are those in Mus musculus strain C57BL/6J chromosome 5 genomic contig, MGSCv37 C57BL/6J, NCBI Reference Sequence: [NT_109320.4](http://www.ncbi.nlm.nih.gov/mapview/maps.cgi?maps=blast_set&db=all_contig&na=1&gnl=ref|NT_109320.4|&gi=149254172&term=149254172%5Bgi%5D&taxid=10090&RID=DUMM1SVJ01S&QUERY_NUMBER=1&log$=nucltop).)

| **oligo sequence nucleotide positions** |
| --- |
| mGS2 CATGGTGGTCATTTTAGACCA 28099458- 28099478 |
| mGS4 AGACCAGGTCATTTTAGCATA 28101563- 28101583 |
| mGS5 AATTTTAGTCATTTTCTTTCT 28101687- 28101707 |
| mGS6 TCGTCTAGTCATTTGAGAACC 28103575- 28103595 |

*Note: There are no mGS1 and mGS3 oligos, since the TCF11 sites are mutated in the mouse DMP1 promoter in those positions corresponding to the rat promoter.*

**D.** TCF11 and NF-kB oligos

| **oligo** | **sequence** |
| --- | --- |
| TCF11 | GTCATTT |
| NF-kB | AGTTGAGGG GACTTTCCCAGGC |

**Table 2.** TCF11 sites in DMP1 promoter

|  | **Start position** | |
| --- | --- | --- |
| **TCF11 site number** | **Rat DMP1 promoter** | **mouse genomic contig a** |
| 1 | -5018 |  |
| 2 | -3997 | 28099465 |
| 3 | -3638 |  |
| 4 | -1937 | 28101570 |
| 5 | -1816 | 28101694 |
| 6 | -7 | 28103582 |

a: Mus musculus strain C57BL/6J chromosome 5 genomic contig, MGSCv37 C57BL/6J, NCBI Reference Sequence: NT_109320.4
